# Supplementary material
Source: PubMed Central journal article supplement (PMC3497417)
Supplement: IAI.00671-12_zii999099927so1.pdf [file IAI.00671-12_zii999099927so1.pdf]

**Supplementary Data 1. PCR Primers**

**Primers for semi-quantitative RT-PCR.** EHI\_098440 (forward) 5'-

TGCAAGATTCATTGAAAAGTGG-3', (reverse) 5'-AATTCAGGGCTTCCCATTCT-

3'. EHI\_105240 (forward) 5'-GGAGAAAATCATGTCCAAGCA-3', (reverse) 5'-

CACAGGATTGATCTGGTGGGA-3'. EHI\_148910 (forward) 5'-

CCACTCCTCAAACCTCCAACAA-3', (reverse) 5'-AGAGGGGGATGGTTCTGAAT-3'.

EHI\_148870 (forward) 5'-AATTGACCCTGTTTGGGATG-3', (reverse) 5'-

ACCCGTTCTGGTTGTACAGG-3'. EHI\_050790 (forward) 5'-

GCAATGCCACCATTCAAAG-3', (reverse) 5'-AAAGCGTCAGCCCTTTCATA-3'.

L10/EHI\_044810 (forward) 5'-CTACTGGGATCCAGGATGTTATAGACTTG-3',

(reverse) 5'-CTACTGGAATTCTTAATTGAATACGTGCTGC-3'.

**Primers for qRT-PCR.** EHI\_105240 (forward) 5'-GGAGAAAATCATGTCCAAGCA-

3', (reverse) 5'-CACAGGATTGATCTGGTGGGA-3'. EHI\_148910 (forward) 5'-

CCACTCCTCAAACCTCCAACAA-3', (reverse) 5'-AGAGGGGGATGGTTCTGAAT-3'.

EHI\_148870 (forward) 5'-AATTGACCCTGTTTGGGATG-3', (reverse) 5'-

ACCCGTTCTGGTTGTACAGG-3'. EHI\_050790 (forward) 5'-

GCAATGCCACCATTCAAAG-3', (reverse) 5'-AAAGCGTCAGCCCTTTCATA-3'.

L10/EHI\_044810 (forward) 5'-CTACTGGGATCCAGGATGTTATAGACTTG-3',

(reverse) 5'-CTACTGGAATTCTTAATTGAATACGTGCTGC-3'.
