# Supplementary material
Source: PubMed Central journal article supplement (PMC3497417)
Supplement: IAI.00671-12_zii999099927so2.pdf [file IAI.00671-12_zii999099927so2.pdf]

**Supplementary Table 1.** Genes found to be more highly expressed in phagocytic compared to non-phagocytic *E. histolytica*. Fold increase is in log(2) format and all results have an adjusted p-value < 0.05.

| <b>Affymetrix ID</b> | <b>GenBank ID</b> | <b>AmoebaDB ID</b> | <b>Protein Name (AmoebaDB annotation)</b>      | <b>logF C</b> | <b>adj.p.valu e</b> |
|----------------------|-------------------|--------------------|------------------------------------------------|---------------|---------------------|
| 248.m00071_at        | XM_644990         | EHI_029600         | hypothetical protein, conserved                | 3.759         | 7.23E-03            |
| 42.m00168_at         | XM_649772         | EHI_124620         | hypothetical protein                           | 2.705         | 7.10E-03            |
| 145.m00077_at        | XM_646732         | EHI_082590         | glutamic acid-rich protein precursor, putative | 2.565         | 8.24E-03            |
| 19.m00283_at         | XM_650928         | EHI_098440         | hypothetical protein, conserved                | 2.483         | 8.24E-03            |
| 29.m00230_at         | XM_650321         | EHI_088070         | ribosomal RNA methyltransferase, putative      | 2.439         | 8.24E-03            |
| 5.m00428_at          | XM_651936         | EHI_110180         | myosin heavy chain                             | 2.426         | 2.04E-02            |
| 60.m00141_at         | XM_649110         | EHI_140720         | myosin heavy chain                             | 2.389         | 1.42E-02            |
| 47.m00161_at         | XM_649577         | EHI_009570         | gelsolin repeat protein, putative              | 2.302         | 9.17E-03            |
| 156.m00107_at        | XM_646504         | EHI_184220         | hypothetical protein                           | 2.219         | 1.81E-02            |
| 181.m00057_at        | XM_646043         | EHI_066720         | hypothetical protein, conserved                | 2.212         | 8.24E-03            |
| 10.m00342_at         | XM_651489         | EHI_050790         | structural maintenance of chromosomes protein  | 2.200         | 2.38E-02            |
| 298.m00063_at        | XM_644386         | EHI_113950         | hypothetical protein, conserved                | 2.154         | 1.19E-02            |
| 528.m00021_at        | XM_643074         | EHI_183900         | snoRNA binding protein, putative               | 2.124         | 1.40E-02            |
| 30.m00245_at         | XM_650273         | EHI_021260         | villidin, putative                             | 2.123         | 8.24E-03            |
| 219.m00091_at        | XM_645357         | EHI_105670         | plastin-2, putative                            | 2.118         | 9.39E-03            |
| 78.m00180_at         | XM_648500         | EHI_045540         | hypothetical protein                           | 2.110         | 8.24E-03            |
| 59.m00163_at         | XM_649122         | EHI_122900         | hypothetical protein, conserved                | 2.107         | 3.39E-02            |
| 208.m00084_at        | XM_645523         | EHI_175400         | hypothetical protein, conserved                | 2.102         | 1.14E-02            |
| 99.m00176_at         | XM_647855         | EHI_025370         | hypothetical protein, conserved                | 2.085         | 8.24E-03            |
| 80.m00149_at         | XM_648419         | EHI_016340         | hypothetical protein                           | 2.081         | 8.24E-03            |
| 853.m00011_at        | XM_642801         | EHI_071210         | hypothetical protein                           | 2.059         | 1.35E-02            |
| 43.m00200_at         | XM_649716         | EHI_007480         | villin, putative                               | 2.052         | 1.94E-02            |
| 187.m00069_at        | XM_645914         | EHI_189500         | calponin homology domain protein, putative     | 2.048         | 7.23E-03            |
| 80.m00150_at         | XM_648420         | EHI_016350         | hypothetical protein, conserved                | 1.972         | 1.87E-02            |
| 1.m00661_at          | XM_652483         | EHI_148910         | interaptin, putative                           | 1.967         | 8.24E-03            |
| 104.m00170_at        | XM_647724         | EHI_177190         | hypothetical protein, conserved                | 1.953         | 1.14E-02            |
| 92.m00169_at         | XM_648060         | EHI_197120         | protein phosphatase, putative                  | 1.942         | 8.24E-03            |

|               |           |            |                                                            |       |          |
|---------------|-----------|------------|------------------------------------------------------------|-------|----------|
| 55.m00175_at  | XM_649286 | EHI_008020 | hypothetical protein, conserved                            | 1.918 | 1.56E-02 |
| 233.m00112_at | XM_645163 | EHI_189540 | hypothetical protein                                       | 1.903 | 4.40E-02 |
| 54.m00221_at  | XM_649330 | EHI_083620 | hypothetical protein                                       | 1.892 | 1.56E-02 |
| 123.m00109_at | XM_647214 | EHI_127340 | translation initiation factor IF-2, putative               | 1.880 | 2.52E-02 |
| 101.m00127_at | XM_647793 | EHI_059690 | hypothetical protein, conserved                            | 1.853 | 2.38E-02 |
| 13.m00295_at  | XM_651257 | EHI_153770 | phosphatidylinositol-4-phosphate 5-kinase, putative        | 1.849 | 2.25E-02 |
| 199.m00088_at | XM_645694 | EHI_017690 | hypothetical protein                                       | 1.844 | 1.50E-02 |
| 310.m00064_at | XM_644295 | EHI_095890 | DNA-directed RNA polymerase I largest subunit, putative    | 1.834 | 1.14E-02 |
| 5.m00472_at   | XM_651915 | EHI_106280 | RecF/RecN/SMC domain containing protein                    | 1.825 | 1.47E-02 |
| 263.m00053_at | XM_644795 | EHI_146100 | hypothetical protein                                       | 1.823 | 2.43E-02 |
| 27.m00265_at  | XM_650441 | EHI_131230 | actin, putative                                            | 1.821 | 8.24E-03 |
| 24.m00313_at  | XM_650625 | EHI_145970 | hypothetical protein                                       | 1.814 | 1.42E-02 |
| 121.m00118_at | XM_647263 | EHI_143620 | hypothetical protein, conserved                            | 1.814 | 1.40E-02 |
| 13.m00303_at  | XM_651265 | EHI_153670 | U1 small nuclear ribonucleoprotein subunit, putative       | 1.796 | 1.78E-02 |
| 469.m00053_at | XM_643273 | EHI_155290 | actinin-like protein, putative                             | 1.757 | 2.53E-02 |
| 3.m00637_at   | XM_652110 | EHI_044930 | eukaryotic translation initiation factor 4 gamma, putative | 1.732 | 1.93E-02 |
| 3.m00570_at   | XM_652193 | EHI_093860 | MIT domain protein                                         | 1.720 | 2.18E-02 |
| 1.m00665_at   | XM_652487 | EHI_148870 | hypothetical protein                                       | 1.707 | 1.06E-02 |
| 16.m00351_at  | XM_651077 | EHI_185240 | long-chain-fatty-acid--CoA ligase, putative                | 1.692 | 4.40E-02 |
| 56.m00155_at  | XM_649260 | EHI_121060 | hypothetical protein, conserved                            | 1.684 | 8.24E-03 |
| 59.m00173_at  | XM_649132 | EHI_122800 | actin-binding protein, putative                            | 1.678 | 8.94E-03 |
| 8.m00387_at   | XM_651681 | EHI_067970 | chorein, putative                                          | 1.674 | 4.40E-02 |
| 50.m00193_at  | XM_649447 | EHI_092290 | hypothetical protein, conserved                            | 1.670 | 1.78E-02 |
| 114.m00147_at | XM_647453 | EHI_008630 | hypothetical protein                                       | 1.670 | 8.24E-03 |
| 48.m00200_at  | XM_649547 | EHI_141900 | chromodomain-helicase-DNA-binding protein, putative        | 1.652 | 3.61E-02 |
| 370.m00045_at | XM_643820 | EHI_003930 | I/LWEQ domain protein                                      | 1.648 | 1.50E-02 |
| 73.m00145_at  | XM_648669 | EHI_039330 | hypothetical protein, conserved                            | 1.648 | 1.81E-02 |
| 44.m00158_at  | XM_649685 | EHI_167130 | filopodin, putative                                        | 1.645 | 2.45E-02 |
| 211.m00077_at | XM_645473 | EHI_091100 | TPR repeat protein                                         | 1.633 | 8.94E-03 |
| 30.m00246_at  | XM_650274 | EHI_021270 | villidin, putative                                         | 1.631 | 1.53E-02 |

|               |           |            |                                                        |       |          |
|---------------|-----------|------------|--------------------------------------------------------|-------|----------|
| 219.m00077_at | XM_645343 | EHI_154180 | zinc finger domain containing protein                  | 1.611 | 8.24E-03 |
| 234.m00049_at | XM_645146 | EHI_063040 | hypothetical protein                                   | 1.611 | 1.14E-02 |
| 22.m00287_at  | XM_650730 | EHI_150430 | villidin, putative                                     | 1.597 | 9.39E-03 |
| 91.m00203_at  | XM_648086 | EHI_000780 | chromodomain-helicase-DNA-binding<br>protein, putative | 1.587 | 1.28E-02 |
| 78.m00175_at  | XM_648505 | EHI_045590 | hypothetical protein                                   | 1.578 | 9.39E-03 |
| 1.m00694_at   | XM_652390 | EHI_148570 | hypothetical protein                                   | 1.550 | 2.34E-02 |
| 43.m00194_at  | XM_649710 | EHI_007640 | hypothetical protein, conserved                        | 1.540 | 1.81E-02 |
| 81.m00164_at  | XM_648396 | EHI_022940 | DNA-directed RNA polymerase subunit,<br>putative       | 1.531 | 1.85E-02 |
| 18.m00327_at  | XM_650959 | EHI_118050 | coatomer alpha subunit, putative                       | 1.529 | 3.61E-02 |
| 58.m00163_at  | XM_649180 | EHI_110740 | hypothetical protein                                   | 1.504 | 3.38E-02 |
| 107.m00116_at | XM_647635 | EHI_048630 | actin, putative                                        | 1.503 | 1.78E-02 |
| 155.m00097_at | XM_646521 | EHI_159750 | hypothetical protein                                   | 1.485 | 2.78E-02 |
| 300.m00062_at | XM_644362 | EHI_103580 | hypothetical protein                                   | 1.476 | 2.97E-02 |
| 83.m00198_at  | XM_648323 | EHI_005910 | Rho guanine nucleotide exchange factor,<br>putative    | 1.467 | 2.43E-02 |
| 100.m00131_at | XM_647829 | EHI_156330 | hypothetical protein                                   | 1.465 | 1.65E-02 |
| 85.m00147_at  | XM_648260 | EHI_103840 | DNA repair protein, putative                           | 1.464 | 1.14E-02 |
| 153.m00105_at | XM_646576 | EHI_134980 | hypothetical protein                                   | 1.456 | 2.70E-02 |
| 173.m00119_at | XM_646183 | EHI_099780 | hypothetical protein                                   | 1.432 | 1.87E-02 |
| 87.m00174_at  | XM_648204 | EHI_199130 | hypothetical protein, conserved                        | 1.428 | 2.69E-02 |
| 47.m00159_at  | XM_649575 | EHI_009540 | hypothetical protein, conserved                        | 1.428 | 1.69E-02 |
| 3.m00546_at   | XM_652115 | EHI_044890 | helicase, putative                                     | 1.426 | 8.24E-03 |
| 131.m00141_at | XM_647036 | EHI_134780 | hypothetical protein, conserved                        | 1.409 | 1.14E-02 |
| 24.m00300_at  | XM_650612 | EHI_152940 | hypothetical protein                                   | 1.406 | 4.51E-02 |
| 476.m00024_at | XM_643242 | EHI_194870 | hypothetical protein, conserved                        | 1.401 | 3.57E-02 |
| 11.m00378_at  | XM_651422 | EHI_125650 | PIWI, putative                                         | 1.391 | 1.61E-02 |
| 12.m00287_at  | XM_651366 | EHI_187280 | transcription initiation factor SPT5, putative         | 1.383 | 1.29E-02 |
| 163.m00096_at | XM_646384 | EHI_119550 | CCR4/NOT transcription complex subunit 3,<br>putative  | 1.381 | 2.82E-02 |
| 50.m00166_at  | XM_649484 | EHI_092080 | hypothetical protein, conserved                        | 1.367 | 2.23E-02 |
| 77.m00153_at  | XM_648516 | EHI_098360 | glycogen debranching enzyme, putative                  | 1.346 | 4.83E-02 |
| 98.m00137_at  | XM_647879 | EHI_008710 | TPR repeat protein                                     | 1.345 | 4.12E-02 |
| 56.m00169_at  | XM_649232 | EHI_183520 | hypothetical protein                                   | 1.324 | 2.82E-02 |

|               |           |            |                                                                 |       |          |
|---------------|-----------|------------|-----------------------------------------------------------------|-------|----------|
| 231.m00078_at | XM_645182 | EHI_007320 | hypothetical protein, conserved                                 | 1.322 | 1.94E-02 |
| 102.m00081_at | XM_647783 | EHI_079960 | hypothetical protein, conserved                                 | 1.321 | 1.94E-02 |
| 31.m00182_at  | XM_650227 | EHI_012590 | hypothetical protein                                            | 1.319 | 9.90E-03 |
| 77.m00164_at  | XM_648527 | EHI_098300 | U2 snRNP auxiliary factor large subunit,<br>putative            | 1.281 | 2.08E-02 |
| 3.m00580_at   | XM_652203 | EHI_093770 | bromodomain-containing protein                                  | 1.245 | 2.40E-02 |
| 29.m00207_at  | XM_650324 | EHI_133920 | TPR repeat protein                                              | 1.242 | 2.14E-02 |
| 4.m00642_at   | XM_652061 | EHI_067560 | hypothetical protein                                            | 1.237 | 1.28E-02 |
| 31.m00193_at  | XM_650239 | EHI_012470 | helicase domain-containing protein                              | 1.236 | 2.09E-02 |
| 2.m00554_at   | XM_652281 | EHI_151520 | DNA polymerase alpha catalytic subunit,<br>putative             | 1.221 | 3.87E-02 |
| 19.m00290_at  | XM_650935 | EHI_098510 | hypothetical protein                                            | 1.206 | 1.78E-02 |
| 141.m00080_at | XM_646818 | EHI_081930 | ATPase, AAA family protein                                      | 1.198 | 2.38E-02 |
| 3.m00571_at   | XM_652194 | EHI_093850 | Viral A-type inclusion protein repeat, putative                 | 1.173 | 2.68E-02 |
| 18.m00335_at  | XM_650967 | EHI_117970 | DNA replication licensing factor                                | 1.170 | 2.07E-02 |
| 151.m00098_at | XM_646614 | EHI_100290 | Rap/Ran GTPase-activating protein, putative                     | 1.156 | 2.53E-02 |
| 68.m00224_at  | XM_648842 | EHI_105240 | BAR/SH3 domain containing protein                               | 1.146 | 2.52E-02 |
| 344.m00051_at | XM_643998 | EHI_056700 | hypothetical protein                                            | 1.146 | 1.78E-02 |
| 151.m00103_at | XM_646619 | EHI_100140 | Rho guanine nucleotide exchange factor,<br>putative             | 1.141 | 2.00E-02 |
| 26.m00308_at  | XM_650468 | EHI_167710 | hypothetical protein, conserved                                 | 1.141 | 2.09E-02 |
| 206.m00083_at | XM_645551 | EHI_033720 | DEAD/DEAH box helicase, putative                                | 1.137 | 4.30E-02 |
| 92.m00180_at  | XM_648052 | EHI_197040 | hypothetical protein                                            | 1.136 | 4.94E-02 |
| 545.m00019_at | XM_643045 | EHI_167940 | hypothetical protein                                            | 1.127 | 2.32E-02 |
| 64.m00149_at  | XM_648945 | EHI_137680 | protein with RhoGEF and ArfGAP domains                          | 1.124 | 1.94E-02 |
| 45.m00158_at  | XM_649656 | EHI_199700 | SMC4 protein, putative                                          | 1.121 | 1.51E-02 |
| 414.m00041_at | XM_643563 | EHI_125170 | DEAD/DEAH box helicase, putative                                | 1.118 | 3.86E-02 |
| 121.m00125_at | XM_647270 | EHI_143550 | hypothetical protein, conserved                                 | 1.115 | 4.51E-02 |
| 26.m00311_at  | XM_650472 | EHI_180030 | hypothetical protein                                            | 1.104 | 1.39E-02 |
| 69.m00175_at  | XM_648792 | EHI_192460 | formin homology 2 family protein                                | 1.097 | 1.78E-02 |
| 128.m00124_at | XM_647116 | EHI_109860 | chromatin-specific transcription elongation<br>factor, putative | 1.089 | 1.78E-02 |
| 259.m00045_at | XM_644837 | EHI_119920 | DEAD/DEAH box helicase, putative                                | 1.077 | 1.64E-02 |
| 71.m00152_at  | XM_648719 | EHI_180420 | hypothetical protein, conserved                                 | 1.061 | 4.32E-02 |
| 882.m00006_at | XM_642784 | EHI_090640 | hypothetical protein, conserved                                 | 1.053 | 3.32E-02 |

|               |           |            |                                 |       |          |
|---------------|-----------|------------|---------------------------------|-------|----------|
| 3.m00567_at   | XM_652190 | EHI_093890 | hypothetical protein, conserved | 1.020 | 4.83E-02 |
| 133.m00148_at | XM_646985 | EHI_054800 | hypothetical protein            | 1.016 | 2.80E-02 |
